# Supplementary material
Source: publisher figshare collection journal article supplement (https://future-science-group.figshare.com/ndownloader/files/21436839)
Supplement: Supplementary file 1 [file 21436839]

| **Table S1** The *u* values and the *z* values for all gypsy moth samples | | | | | | |
| --- | --- | --- | --- | --- | --- | --- |
| **Collection date** | **u values/z values** | | | | | |
| 1957 | *u* values | 4855.78 | 4935.10 | 5240.27 | 3871.17 | 5128.99 |
| *z* values | 1.466 | 1.645 | 1.399 | 1.437 | 1.568 |
| 1964 | *u* values | 5216.21 | 4910.87 | 5159.43 | 4834.42 |  |
| *z* values | 1.547 | 1.589 | 1.733 | 1.508 |  |
| 1973 | *u* values | 5093.72 | 4617.44 | 4642.74 |  |  |
| *z* values | 1.549 | 1.690 | 1.506 |  |  |
| 1979 | *u* values | 4276.43 | 4552.70 | 4323.76 | 4136.85 | 5274.26 |
| 5152.25 | 4944.13 | 4735.97 |  |  |
| *z* values | 1.547 | 1.688 | 1.794 | 1.842 | 2.010 |
| 1.085 | 1.754 | 1.012 |  |  |
| 1982 | *u* values | 5059.96 | 4466.68 | 4487.32 | 5127.94 | 4963.03 |
| 4715.65 | 4773.04 |  |  |  |
| *z* values | 1.083 | 0.936 | 1.597 | 2.581 | 1.489 |
| 1.593 | 1.378 |  |  |  |
| 1987 | *u* values | 4257.31 | 4239.62 | 4683.62 |  |  |
| *z* values | 1.567 | 2.534 | 1.462 |  |  |
| 1993 | *u* values | 4369.67 | 4174.49 | 4100.21 | 4561.00 | 4180.78 |
| 4273.50 |  |  |  |  |
| *z* values | 1.564 | 1.352 | 1.496 | 2.418 | 1.395 |
| 1.493 |  |  |  |  |
| 1996 | *u* values | 3654.04 | 3434.89 | 3681.48 | 4537.21 | 3985.49 |
| 3886.66 |  |  |  |  |
| *z* values | 1.291 | 1.104 | 1.785 | 1.030 | 1.102 |
| 0.953 |  |  |  |  |
| 1999 | *u* values | 3981.21 | 3744.90 | 3482.02 |  |  |
| *z* values | 1.534 | 2.480 | 1.431 |  |  |

| **Table S2** The *u* values of some samples in this study | | | | | | |
| --- | --- | --- | --- | --- | --- | --- |
| **Species** | **Stage/Treatment of wings** | ***u* values** | | | | |
| *Gastropacha populifolia* | spread | 6308.35 | 5977.64 | 6112.47 | 5845.90 |  |
| folded | 5568.86 | 5961.25 | 6098.68 | 5130.05 | 5729.35 |
| 4640.37 | 4425.17 | 6311.94 |  |  |
| *Pterostoma sinicun* | spread | 5325.38 | 5806.19 | 5399.57 |  |  |
| folded | 5771.01 | 4517.32 | 4843.79 |  |  |
| *Dendrolimus tabulaeformis* | spread | 5557.41 | 5220.84 | 5930.49 |  |  |
| folded | 3609.07 | 3354.80 | 3995.68 | 3717.89 | 4747.44 |
| *Semiothisa cmerearia* | spread | 5116.77 | 5123.29 | 5202.43 | 4997.00 | 5128.99 |
| folded | 4712.84 | 4352.95 | 4520.51 | 4318.62 | 4404.51 |
| *Leuoma candida* | spread | 5574.25 | 5513.51 | 5671.18 | 5199.29 | 5361.68 |
| folded | 4665.70 | 4542.15 | 4602.57 | 4380.35 | 4396.83 |
| *Spilosoma niveus* | spread | 5381.39 | 5176.83 | 5261.96 | 5458.77 | 5486.48 |
| folded | 4384.51 | 4073.56 | 4627.23 | 4392.40 | 4364.66 |
| *Dendrolimus punctatus* | adult | 6622.52 | 5959.48 | 5590.03 |  |  |
| larva | 3642.72 | 3897.27 | 3914.35 | 3727.87 | 3801.70 |
| 3780.86 | 3501.77 | 3796.22 | 3546.98 |  |
| *Culcula panterinaria* | adult | 5156.77 | 5602.55 | 5209.69 | 5740.20 | 6441.64 |
| larva | 4242.50 | 3661.93 | 3724.95 | 3914.81 |  |
| *Dictyoploca japonica* | adult | 5063.29 | 5198.86 | 5671.83 |  |  |
| larva | 3618.33 | 3271.92 | 3357.05 | 3361.00 | 2821.67 |
| *Ourapteryx nivea* | adult | 5386.29 | 5420.06 | 5012.03 | 5372.22 | 5473.03 |
| larva | 3497.65 | 3212.59 | 3415.38 | 3352.75 | 3275.44 |
| *Clostera anastomosis* | adult | 6013.59 | 6411.08 | 6386.92 | 6279.43 | 6097.56 |
| larva | 3632.40 | 4240.52 | 4237.11 | 3383.06 |  |
| *Spilarctia subcarnea* | adult | 5149.34 | 5452.46 | 5462.36 | 5335.47 | 5167.13 |
| larva | 3850.80 | 3384.74 | 3259.26 | 3272.81 | 3261.24 |
| *Dendrolimus tabulaeformis* | adult | 5557.41 | 5220.84 | 5930.49 |  |  |
| larva | 3733.99 | 3670.80 | 3468.13 | 3641.13 | 3606.33 |
| 3402.17 |  |  |  |  |
| *Percnia giraffata* | adult | 5867.17 | 5641.11 | 5870.61 | 5235.88 |  |
| larva | 3473.55 | 3658.58 | 3602.05 | 3577.31 |  |

| **Table S3** The z values of some samples in this study | | | | | | |
| --- | --- | --- | --- | --- | --- | --- |
| **Species** | **Stage/Treatment of wings** | ***z* values** | | | | |
| *Gastropacha populifolia* | spread | 1.867 | 1.844 | 1.870 | 1.658 |  |
| folded | 1.501 | 1.468 | 1.501 | 1.487 | 1.471 |
| 1.502 | 1.508 | 1.490 |  |  |
| *Pterostoma sinicun* | spread | 1.422 | 1.474 | 1.456 |  |  |
| folded | 1.214 | 1.241 | 1.216 |  |  |
| *Dendrolimus tabulaeformis* | spread | 1.551 | 1.528 | 1.510 |  |  |
| folded | 1.350 | 1.373 | 1.303 | 1.334 | 1.338 |
| *Semiothisa cmerearia* | spread | 1.500 | 1.514 | 1.515 | 1.509 | 1.498 |
| folded | 1.304 | 1.315 | 1.313 | 1.301 | 1.303 |
| *Leuoma candidas* | spread | 1.517 | 1.605 | 1.525 | 1.606 | 1.515 |
| folded | 1.302 | 1.418 | 1.395 | 1.383 | 1.411 |
| *Spilosoma niveus* | spread | 1.541 | 1.537 | 1.556 | 1.546 | 1.548 |
| folded | 1.392 | 1.349 | 1.378 | 1.372 | 1.352 |
| *Dendrolimus punctatus* | adult | 1.578 | 1.498 | 1.437 |  |  |
| larva | 1.181 | 1.208 | 1.349 | 1.180 | 1.193 |
| 1.244 | 1.211 | 1.172 | 1.124 |  |
| *Culcula panterinaria* | adult | 1.816 | 1.770 | 1.653 | 1.566 | 1.452 |
| larva | 1.390 | 1.397 | 1.347 | 1.374 |  |
| *Dictyoploca japonica* | adult | 1.641 | 1.609 | 1.594 |  |  |
| larva | 1.280 | 1.354 | 1.336 | 1.304 | 1.319 |
| *Ourapteryx nivea* | adult | 1.545 | 1.541 | 1.543 | 1.540 | 1.538 |
| larva | 1.343 | 1.329 | 1.368 | 1.317 | 1.321 |
| *Clostera anastomosis* | adult | 1.544 | 1.496 | 1.447 | 1.555 | 1.508 |
| larva | 1.238 | 1.320 | 1.301 | 1.264 |  |
| *Spilarctia subcarnea* | adult | 1.546 | 1.538 | 1.574 | 1.524 | 1.530 |
| larva | 1.259 | 1.343 | 1.387 | 1.272 | 1.353 |
| *Dendrolimus tabulaeformis* | adult | 1.597 | 1.620 | 1.591 |  |  |
| larva | 1.283 | 1.303 | 1.272 | 1.294 | 1.287 |
| 1.290 |  |  |  |  |
| *Percnia giraffata* | adult | 1.721 | 1.671 | 1.676 | 1.625 |  |
| larva | 1.486 | 1.398 | 1.397 | 1.293 |  |

| **Table S4** The ratio of *u* values and the ratio of *z* values for the folded and spread specimens | | |
| --- | --- | --- |
| **Species** | **ufoldeded/uspread** | **zfolded/zspread** |
| *Gastropacha populifolia* | 0.883 | 0.804 |
| 0.932 | 0.814 |
| 0.911 | 0.803 |
| 0.953 | 0.905 |
| 0.945 | 0.786 |
| 0.997 | 0.796 |
| 0.975 | 0.785 |
| 1.020 | 0.886 |
| 0.967 | 0.804 |
| 1.020 | 0.814 |
| 0.998 | 0.803 |
| 1.043 | 0.905 |
| 0.813 | 0.796 |
| 0.858 | 0.807 |
| 0.839 | 0.795 |
| 0.878 | 0.897 |
| 0.908 | 0.788 |
| 0.958 | 0.798 |
| 0.937 | 0.786 |
| 0.980 | 0.887 |
| 0.736 | 0.804 |
| 0.776 | 0.815 |
| 0.759 | 0.803 |
| 0.794 | 0.906 |
| 0.701 | 0.808 |
| 0.740 | 0.818 |
| 0.724 | 0.806 |
| 0.757 | 0.910 |
| 1.001 | 0.798 |
| 1.056 | 0.808 |
| 1.033 | 0.797 |
| 1.080 | 0.899 |
| *Pterostoma sinicun* | 1.084 | 0.854 |
| 0.994 | 0.824 |
| 1.069 | 0.834 |
| 0.848 | 0.873 |
| 0.778 | 0.842 |
| 0.837 | 0.852 |
| 0.910 | 0.855 |
| 0.834 | 0.825 |
| 0.897 | 0.835 |
| *Dendrolimus tabulaeformis* | 0.649 | 0.871 |
| 0.691 | 0.883 |
| 0.609 | 0.894 |
| 0.604 | 0.885 |
| 0.643 | 0.898 |
| 0.566 | 0.909 |
| 0.719 | 0.840 |
| 0.765 | 0.853 |
| 0.674 | 0.863 |
| 0.669 | 0.860 |
| 0.712 | 0.873 |
| 0.627 | 0.883 |
| 0.854 | 0.863 |
| 0.909 | 0.876 |
| 0.801 | 0.886 |
| *Semiothisa cmerearia* | 0.921 | 0.869 |
| 0.851 | 0.876 |
| 0.883 | 0.875 |
| 0.844 | 0.868 |
| 0.861 | 0.868 |
| 0.920 | 0.862 |
| 0.850 | 0.869 |
| 0.882 | 0.867 |
| 0.843 | 0.860 |
| 0.860 | 0.861 |
| 0.906 | 0.861 |
| 0.837 | 0.868 |
| 0.869 | 0.866 |
| 0.830 | 0.859 |
| 0.847 | 0.860 |
| 0.943 | 0.864 |
| 0.871 | 0.871 |
| 0.905 | 0.870 |
| 0.864 | 0.863 |
| 0.881 | 0.863 |
| 0.919 | 0.870 |
| 0.849 | 0.878 |
| 0.881 | 0.876 |
| 0.842 | 0.869 |
| 0.859 | 0.869 |
| *Leuoma candida* | 0.837 | 0.858 |
| 0.815 | 0.934 |
| 0.826 | 0.919 |
| 0.786 | 0.911 |
| 0.789 | 0.930 |
| 0.846 | 0.811 |
| 0.824 | 0.883 |
| 0.835 | 0.869 |
| 0.794 | 0.861 |
| 0.797 | 0.879 |
| 0.823 | 0.854 |
| 0.801 | 0.930 |
| 0.812 | 0.915 |
| 0.772 | 0.907 |
| 0.775 | 0.926 |
| 0.897 | 0.810 |
| 0.874 | 0.883 |
| 0.885 | 0.868 |
| 0.842 | 0.861 |
| 0.846 | 0.879 |
| 0.870 | 0.859 |
| 0.847 | 0.936 |
| 0.858 | 0.921 |
| 0.817 | 0.913 |
| 0.820 | 0.932 |
| *Spilosoma niveus* | 0.815 | 0.903 |
| 0.757 | 0.875 |
| 0.860 | 0.894 |
| 0.816 | 0.890 |
| 0.810 | 0.877 |
| 0.847 | 0.906 |
| 0.787 | 0.878 |
| 0.894 | 0.896 |
| 0.848 | 0.892 |
| 0.843 | 0.879 |
| 0.833 | 0.895 |
| 0.774 | 0.867 |
| 0.879 | 0.886 |
| 0.835 | 0.882 |
| 0.829 | 0.869 |
| 0.803 | 0.901 |
| 0.746 | 0.873 |
| 0.848 | 0.892 |
| 0.805 | 0.888 |
| 0.800 | 0.875 |
| 0.799 | 0.899 |
| 0.742 | 0.871 |
| 0.843 | 0.890 |
| 0.801 | 0.886 |
| 0.796 | 0.873 |

| **Table S5** The ratio of the *u* values and the ratio of *z* values for formalin-fixed larvae and air-dried adult specimens | | |
| --- | --- | --- |
| **Species** | **uformalin/udry** | **zformalin/zdry** |
| *Dendrolimus punctatus* | 0.550 | 0.748 |
| 0.611 | 0.788 |
| 0.652 | 0.822 |
| 0.588 | 0.765 |
| 0.654 | 0.806 |
| 0.697 | 0.841 |
| 0.591 | 0.855 |
| 0.657 | 0.901 |
| 0.700 | 0.939 |
| 0.563 | 0.748 |
| 0.626 | 0.788 |
| 0.667 | 0.821 |
| 0.574 | 0.756 |
| 0.638 | 0.796 |
| 0.680 | 0.830 |
| 0.571 | 0.788 |
| 0.634 | 0.830 |
| 0.676 | 0.866 |
| 0.529 | 0.767 |
| 0.588 | 0.808 |
| 0.626 | 0.843 |
| 0.573 | 0.743 |
| 0.637 | 0.782 |
| 0.679 | 0.816 |
| 0.536 | 0.712 |
| 0.595 | 0.750 |
| 0.635 | 0.782 |
| *Culcula panterinaria* | 0.823 | 0.765 |
| 0.757 | 0.785 |
| 0.814 | 0.841 |
| 0.739 | 0.888 |
| 0.659 | 0.957 |
| 0.710 | 0.769 |
| 0.654 | 0.789 |
| 0.703 | 0.845 |
| 0.638 | 0.892 |
| 0.568 | 0.962 |
| 0.722 | 0.742 |
| 0.665 | 0.761 |
| 0.715 | 0.815 |
| 0.649 | 0.860 |
| 0.578 | 0.928 |
| 0.759 | 0.757 |
| 0.699 | 0.776 |
| 0.751 | 0.831 |
| 0.604 | 0.878 |
| 0.645 | 0.946 |
| *Dictyoploca japonica* | 0.620 | 0.780 |
| 0.637 | 0.795 |
| 0.634 | 0.803 |
| 0.645 | 0.825 |
| 0.632 | 0.841 |
| 0.657 | 0.849 |
| 0.623 | 0.814 |
| 0.688 | 0.830 |
| 0.689 | 0.838 |
| 0.681 | 0.795 |
| 0.622 | 0.810 |
| 0.614 | 0.818 |
| 0.622 | 0.804 |
| 0.661 | 0.820 |
| 0.634 | 0.827 |
| *Ourapteryx nivea* | 0.649 | 0.869 |
| 0.596 | 0.860 |
| 0.634 | 0.885 |
| 0.622 | 0.852 |
| 0.608 | 0.855 |
| 0.645 | 0.872 |
| 0.593 | 0.863 |
| 0.630 | 0.888 |
| 0.619 | 0.855 |
| 0.604 | 0.858 |
| 0.698 | 0.870 |
| 0.641 | 0.861 |
| 0.681 | 0.886 |
| 0.669 | 0.853 |
| 0.654 | 0.856 |
| 0.651 | 0.872 |
| 0.598 | 0.863 |
| 0.636 | 0.888 |
| 0.624 | 0.855 |
| 0.610 | 0.858 |
| 0.639 | 0.873 |
| 0.587 | 0.864 |
| 0.624 | 0.889 |
| 0.613 | 0.856 |
| 0.598 | 0.859 |
| *Clostera anastomosis* | 0.604 | 0.802 |
| 0.567 | 0.828 |
| 0.569 | 0.856 |
| 0.578 | 0.796 |
| 0.596 | 0.821 |
| 0.705 | 0.855 |
| 0.661 | 0.883 |
| 0.664 | 0.912 |
| 0.675 | 0.849 |
| 0.695 | 0.875 |
| 0.705 | 0.843 |
| 0.661 | 0.870 |
| 0.663 | 0.899 |
| 0.675 | 0.837 |
| 0.695 | 0.862 |
| 0.563 | 0.819 |
| 0.528 | 0.845 |
| 0.530 | 0.874 |
| 0.539 | 0.813 |
| 0.555 | 0.838 |
| *Spilarctia subcarnea* | 0.748 | 0.814 |
| 0.657 | 0.868 |
| 0.633 | 0.897 |
| 0.636 | 0.822 |
| 0.633 | 0.875 |
| 0.706 | 0.819 |
| 0.621 | 0.873 |
| 0.598 | 0.902 |
| 0.600 | 0.827 |
| 0.598 | 0.880 |
| 0.705 | 0.800 |
| 0.620 | 0.853 |
| 0.597 | 0.881 |
| 0.599 | 0.808 |
| 0.597 | 0.860 |
| 0.722 | 0.826 |
| 0.634 | 0.881 |
| 0.611 | 0.910 |
| 0.613 | 0.834 |
| 0.611 | 0.888 |
| 0.745 | 0.823 |
| 0.655 | 0.878 |
| 0.631 | 0.907 |
| 0.633 | 0.831 |
| 0.631 | 0.885 |
| *Dendrolimus tabulaeformis* | 0.672 | 0.803 |
| 0.715 | 0.792 |
| 0.630 | 0.807 |
| 0.661 | 0.816 |
| 0.703 | 0.804 |
| 0.619 | 0.819 |
| 0.624 | 0.797 |
| 0.664 | 0.785 |
| 0.585 | 0.800 |
| 0.655 | 0.810 |
| 0.697 | 0.799 |
| 0.614 | 0.813 |
| 0.649 | 0.806 |
| 0.691 | 0.795 |
| 0.608 | 0.809 |
| 0.612 | 0.808 |
| 0.652 | 0.796 |
| 0.574 | 0.811 |
| *Percnia giraffata* | 0.592 | 0.863 |
| 0.616 | 0.890 |
| 0.592 | 0.887 |
| 0.663 | 0.914 |
| 0.624 | 0.812 |
| 0.649 | 0.837 |
| 0.623 | 0.834 |
| 0.699 | 0.860 |
| 0.614 | 0.812 |
| 0.639 | 0.836 |
| 0.614 | 0.833 |
| 0.688 | 0.859 |
| 0.610 | 0.751 |
| 0.634 | 0.774 |
| 0.609 | 0.771 |
| 0.683 | 0.795 |

| Table S6 All primers used in this study | | | | | |
| --- | --- | --- | --- | --- | --- |
| Primers Name | Direction | Nucleotide sequence 5'-3' | Primer length(bp) | Length (bp) | Anneal temperatures |
| Lep | F | ATTCAACCAATCATAAAAGATAT | 23 | 650 | 51.0 |
| R | TAAACTTCTGGATGTCCAAAA | 22 |
| Ld 2-18S | F | AACGGCTACCACATCCAAGG | 20 | 312 | 53.4 |
| R | GCTCACCGACGATATGCTCC | 20 |
| Ld 3-18S | F | TCTCGGTTCTATTTTGTTGG | 20 | 390 | 51 |
| R | GAGATTTCCCGTGTTGAGTC | 20 |
| Ld 4-18S | F | AGAACTCTGACCAGTGATGGGATG | 24 | 391 | 56.8 |
| R | GGCGCACAAATGCAACTACG | 20 |
| Ld 5-18S | F | AACGGCTACCACATCCAAGG | 20 | 592 | 56.8 |
| R | TTCGCTGATGTTCGTCTTGC | 20 |
| Ld 6-ITS1 | F | CTTGGGCCGCGTTCGTAAAC | 20 | 313 | 56.8 |
| R | CTCCACGGACCGCAATGTGC | 20 |
| Ld 7-ITS1 | F | GGCGTTGCTGGGAAGTTGAC | 20 | 429 | 56.8 |
| R | TCGTGGTTGCGGACTTTTCG | 25 |
| Ld 8-ITS1 | F | TGCTACCGATTGAATGATTTAGTGG | 20 | 491 | 56.8 |
| R | TCGTGGTTGCGGACTTTTCG | 20 |
| Ld 9-ITS1 | F | AAAGTCGTAACAAGGTTCCGTA | 22 | 596 | 54.3 |
| R | ATCCACCGTCCAGGGTAATA | 20 |
| Ld 10-ITS2 | F | GGAGATACATCCAGGACCAC | 20 | 311 | 51 |
| R | GCCGTACACGAATGTCAACT | 20 |
| Ld 11-ITS2 | F | GGAGATACATCCAGGACCAC | 20 | 393 | 52.3 |
| R | TATAGCGACGTGCAATACTC | 20 |
| Ld 12-ITS2 | F | GGAGATACATCCAGGACCAC | 20 | 791 | 53.4 |
| R | GCAACCGCTACGAAGTTATT | 20 |
| Ld 13-ITS2 | F | TGCGGTCCGTGGAGATACAT | 20 | 589 | 56.8 |
| R | TGCTTAAATTCGGCGGGTGA | 20 |
| Ld 14-EF-1a | F | TGAACCACCATACAGCGAATC | 21 | 321 | 51 |
| R | CCTACGGGCACTGTACCAAT | 20 |
| Ld 15-EF-1a | F | ATTGGTACAGTGCCCGTAGG | 20 | 409 | 48.5 |
| R | TGATGGATTTGGGGTTCTCC | 20 |
| Ld 16-EF-1a | F | TGAACCACCATACAGCGAATC | 21 | 499 | 51 |
| R | GTAACCACGACGCAACTCCT | 20 |
| Ld 17-EF-1a | F | CTCTAAGAACGGTCAAACAC | 20 | 592 | 51 |
| R | GTAACCACGACGCAACTCCT | 20 |
| Ld 18-ND5 | F | AGAAACTGGAGTAGGTGCTG | 20 | 305 | 48 |
| R | GTTGGGATGGTTTAGGATTA | 20 |
| Ld 19-ND5 | F | AGGAATCCCACATAAAGC | 18 | 438 | 48 |
| R | GCAGCACCTACTCCAGTT | 18 |
| Ld 20-ND5 | F | TCATAATTTGCTCTAACACC | 20 | 46 | 48 |
| R | TTATTAGGTTGGGATGGT | 18 |
| Ld 21-ND5 | F | AAAGGAATCCCACATAAAG | 19 | 629 | 48 |
| R | CGAATTGGGGATGTTTTA | 18 |
| Ld 22-ND4 | F | AACTTCGACTATGTAAACGC | 20 | 612 | 48.5 |
| R | TGATTATTGGGTGAGGCTAT | 20 |
| Ld 23-ND4 | F | TAAACTTCGACTATGTAAACGC | 22 | 385 | 48.5 |
| R | ATGACTTCCCAAAGCTCATG | 20 |
| Ld 24-ND4 | F | TAACAAACCATACCCTCCTA | 20 | 310 | 49.0 |
| R | GTGAGGCTATCAACCTGAAC | 20 |
| Ld 25-ND4 | F | CCAGAAACAGGAGCTTCTAC | 20 | 508 | 47 |
| R | GTAATTTAAGATATTTAATTTCTTG | 25 |
| Ld 26-ATP6 | F | TCAATCTTCGACCCATCTAC | 20 | 384 | 51 |
| R | TCCTTGAGGGATTATGTGAA | 20 |
| Ld 27-ATP6 | F | AATCTTCGACCCATCTACTA | 20 | 611 | 47 |
| R | ATGATTGGATAACCGCAACT | 20 |
| Ld 28-ATP6 |  | GACCTGCAATTATATTAGCG | 20 | 498 | 47 |
|  | TTTTCAATCTTCGACCCA | 18 |
| Ld 29-ATP6 |  | CCGACCGGGAACACTAGCTGTAGG | 24 | 313 | 52.3 |
|  | GAGTTATAACTCCAATAGCTCCAG | 24 |
| Ld 30-COI |  | CCTGAAAATAGTGGATATCAGTG | 23 | 303 | 54.3 |
|  | CACGAGCTTACTTTACCTCTGC | 22 |
| Ld 31-COI |  | TGGGAAATTATTCCAAATCCTGG | 23 | 412 | 48.5 |
|  | GAAAATGGAGCAGGAACAGGATGA | 24 |
| Ld 32-COI |  | GAGCCCAAACAATAAATC | 18 | 508 | 48.5 |
|  | TGGAGCAGGAACAGGACG | 18 |
| Ld 33-COI |  | GCAGGGTCAAAAAAGGAT | 18 | 598 |  |
|  | TCGAGCTGAATTAGGGAA | 18 |
